# Supplementary material
Source: PubMed Central journal article supplement (PMC4512544)
Supplement: 10.1534_115.175885_genetics.115.175885-2.pdf [file 10.1534_115.175885_genetics.115.175885-2.pdf]

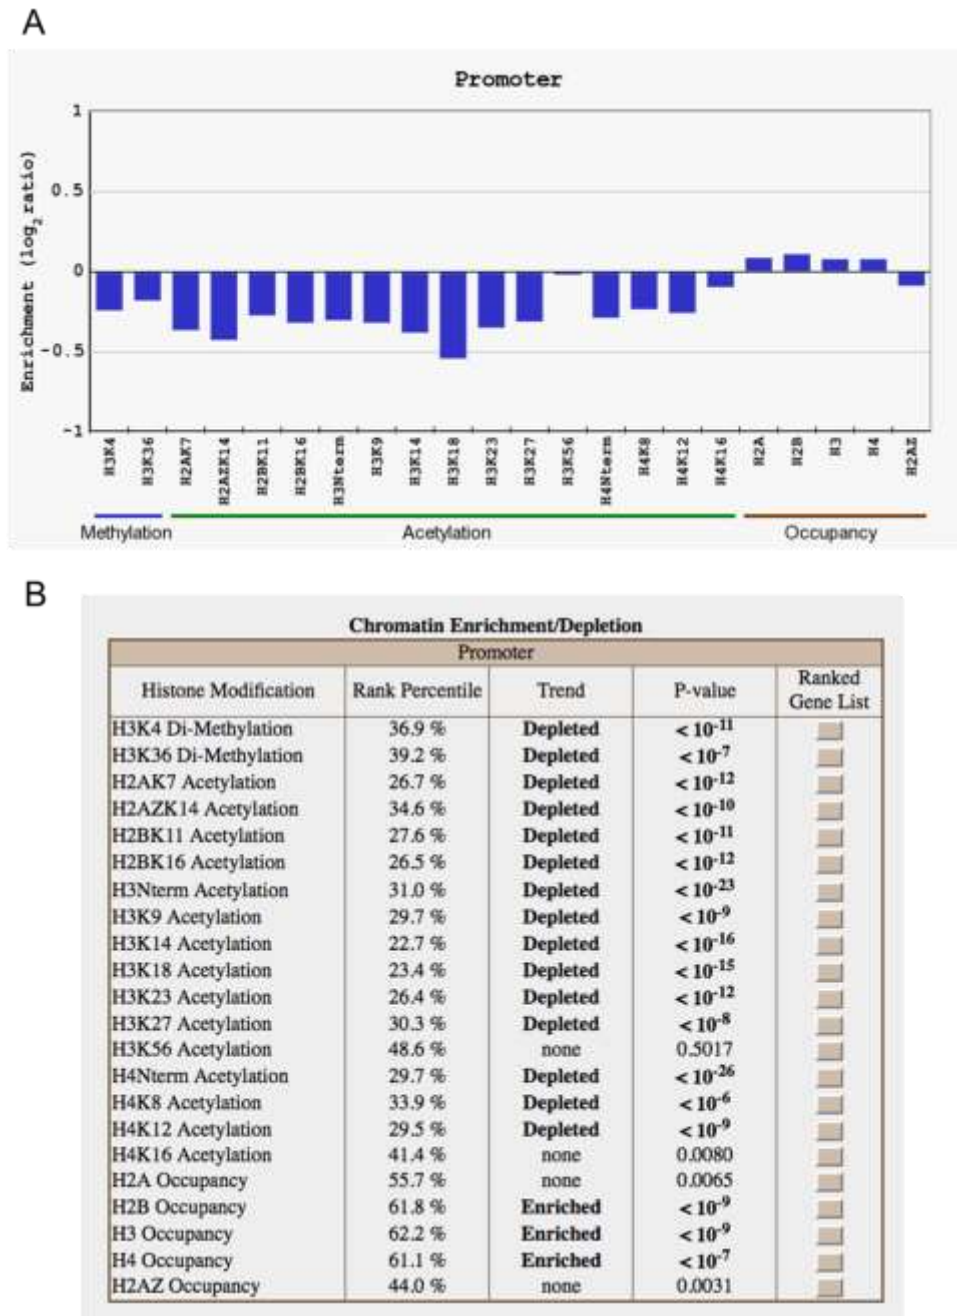

Figure S4. Genes repressed by the H2A R78 sprocket arginine residue have high levels of promoter histone occupancy and low levels of active histone post-translational modifications. (A) Histone occupancy and histone modification levels in the promoter regions of 290 genes repressed by H2A R78 (i.e., genes with induced expression in the H2A R78A mutant). Analysis was performed on published ChIP-chip data sets using the web-based database ChromatinDB (O'CONNOR AND WYRICK 2007). Note, histone modification data were normalized by nucleosome occupancy levels. (B) Statistical analysis of the data shown in part A showing enrichment or depletion of histone occupancy or post-translational modifications.
