# Supplementary material
Source: PubMed Central journal article supplement (PMC4512544)
Supplement: 10.1534_115.175885_genetics.115.175885-3.pdf [file 10.1534_115.175885_genetics.115.175885-3.pdf]

TABLE S3. Microarray data for H2A R78A mutant

| <b>Gene Name</b> | <b>Fold Change</b> |
|------------------|--------------------|
| <b>CCL1</b>      | N.S.*              |
| <b>KIN28</b>     | N.S.               |
| <b>RAD1</b>      | N.S.               |
| <b>RAD2</b>      | N.S.               |
| <b>RAD3</b>      | N.S.               |
| <b>RAD4</b>      | 1.3                |
| <b>RAD7</b>      | N.S.               |
| <b>RAD10</b>     | N.S.               |
| <b>RAD14</b>     | N.S.               |
| <b>RAD16</b>     | 1.4                |
| <b>RAD23</b>     | N.S.               |
| <b>RAD26</b>     | N.S.               |
| <b>RAD28</b>     | N.S.               |
| <b>SSL1</b>      | N.S.               |
| <b>SSL2</b>      | N.S.               |
| <b>TFB1</b>      | N.S.               |
| <b>TFB2</b>      | N.S.               |
| <b>TFB3</b>      | N.S.               |
| <b>TFB4</b>      | N.S.               |
| <b>TFB5</b>      | N.S.               |

\*N.S.: Not Significant
