# Supplementary material
Source: PubMed Central journal article supplement (PMC4512544)
Supplement: 10.1534_115.175885_genetics.115.175885-4.pdf [file 10.1534_115.175885_genetics.115.175885-4.pdf]

TABLE S1. Yeast strains

| Strain Name                                 | Genotype                                                                                                                             | Used in  |
|---------------------------------------------|--------------------------------------------------------------------------------------------------------------------------------------|----------|
| WY500* (WT)                                 | <i>MATa his3-1 leu2-0 met15-0 ura3-0 hht1-hhf1::KAN hhf2-hht2::NAT hta1-htb1::HPH hta2-htb2::NAT p[CEN URA3 HTA1-HTB1-HHT2-HHF2]</i> | Fig. 1,5 |
| LT041<br>(WT snf5Δ HO-LacZ Fusion)          | Isogenic to WY500, plus <i>snf5::HIS3 HO::LacZ</i>                                                                                   | Fig. 2   |
| LT070<br>(WT snf5Δ HO-LacZ Fusion)          | Isogenic to LT041; WT URA plasmid replaced with <i>p[CEN LEU2 HTA1-HTB1-HHT2-HHF2]</i>                                               | Fig. 2   |
| LT054<br>(H4 R45A +WT HO-LacZ Fusion snf5Δ) | Isogenic to LT041 plus <i>p[CEN LEU2 HTA1-HTB1-HHT2-hhf2_R45A]</i>                                                                   | Fig. 2   |
| LT063<br>(H3 R63A HO-LacZ Fusion snf5Δ)     | Isogenic to LT041 plus <i>p[CEN LEU2 HTA1-HTB1-hht2_R63A-HHF2]</i>                                                                   | Fig. 2   |
| LT064<br>(H3 R83A HO-LacZ Fusion snf5Δ)     | Isogenic to LT041 plus <i>p[CEN LEU2 HTA1-HTB1-hht2_R83A-HHF2]</i>                                                                   | Fig. 2   |
| LT061<br>(H2A R43A HO-LacZ Fusion snf5Δ)    | Isogenic to LT041 plus <i>p[CEN LEU2 hta1_R4A3-HTB1-HHT2-HHF2]</i>                                                                   | Fig. 2   |
| LT052<br>(H2B R36A HO-LacZ Fusion snf5Δ)    | Isogenic to LT041 plus <i>p[CEN LEU2 HTA1-htb1_R36A-HHT2-HHF2]</i>                                                                   | Fig. 2   |
| LT051<br>(H2A R78A HO-LacZ Fusion snf5Δ)    | Isogenic to LT041 plus <i>p[CEN LEU2 hta1_R78A-HTB1-HHT2-HHF2]</i>                                                                   | Fig. 2   |
| LT062<br>(H3 R49A HO-LacZ Fusion snf5Δ)     | Isogenic to LT041 plus <i>p[CEN LEU2 HTA1-HTB1-hht2_R49A-HHF2]</i>                                                                   | Fig. 2   |
| LT060<br>(WT SNF5 HO-LacZ Fusion)           | Isogenic to WY500 plus <i>HO::LacZ</i> ; WT URA plasmid replaced with <i>p[CEN LEU2 HTA1-HTB1-HHT2-HHF2]</i>                         | Fig. 2   |
| LT059<br>(H4 R45A +WT HO-LacZ Fusion SNF5)  | Isogenic to LT060 plus <i>p[CEN URA3 HTA1-HTB1-HHT2-HHF2] p[CEN LEU2 HTA1-HTB1-HHT2-hhf2_R45A]</i>                                   | Fig. 2   |
| LT067<br>(H3 R63A HO-LacZ Fusion SNF5)      | Isogenic to LT060 plus <i>p[CEN LEU2 HTA1-HTB1-hht2_R63A-HHF2]</i>                                                                   | Fig. 2   |
| LT068<br>(H3 R83A HO-LacZ Fusion SNF5)      | Isogenic to LT060 plus <i>p[CEN LEU2 HTA1-HTB1-hht2_R83A-HHF2]</i>                                                                   | Fig. 2   |
| LT065<br>(H2A R43A HO-LacZ Fusion SNF5)     | Isogenic to LT060 plus <i>p[CEN LEU2 hta1_R43A-HTB1-HHT2-HHF2]</i>                                                                   | Fig. 2   |
| LT057<br>(H2B R36A HO-LacZ Fusion SNF5)     | Isogenic to LT060 plus <i>p[CEN LEU2 HTA1-htb1_R36A-HHT2-HHF2]</i>                                                                   | Fig. 2   |

|                                        |                                                                                                               |                            |
|----------------------------------------|---------------------------------------------------------------------------------------------------------------|----------------------------|
| LT056<br>H2A R78A HO-LacZ Fusion SNF5) | Isogenic to LT060 plus p[ <i>CEN LEU2 hta1_R78A-HTB1-HHT2-HHF2</i> ]                                          | Fig. 2                     |
| LT066<br>H3 R49A HO-LacZ Fusion SNF5)  | Isogenic to LT060 plus p[ <i>CEN LEU2 hta1_R78A-HTB1-hht2_R49A-HHF2</i> ]                                     | Fig. 2                     |
| WY504 (IJ400) (WT)                     | Isogenic to WY500; URA plasmid replaced with p[ <i>CEN LEU2 HTA1-HTB1-HHT2-HHF2</i> ]                         | Fig. 2,3,4, S1, S2, S3, S4 |
| YAH034<br>(WT Flo8-His3 Fusion)        | Isogenic to WY500 plus <i>FLO8::HIS3</i> ; URA plasmid replaced with p[ <i>CEN LEU2 HTA1-HTB1-HHT2-HHF2</i> ] | Fig. 2                     |
| YEW2<br>(H4 R45H Flo8-HIS3 Fusion)     | Isogenic to YAH034; URA plasmid replaced with p[ <i>CEN LEU2 HTA1-HTB1-HHT2-hhf2_R45H</i> ]                   | Fig. 2                     |
| YAH035<br>(H3 R63A Flo8-HIS3 Fusion)   | Isogenic to YAH034; URA plasmid replaced with p[ <i>CEN LEU2 HTA1-HTB1-hht2_R63A-HHF2</i> ]                   | Fig. 2                     |
| YAH036<br>(H3 R83A Flo8-HIS3 Fusion)   | Isogenic to YAH034; URA plasmid replaced with p[ <i>CEN LEU2 HTA1-HTB1-hht2_R83A-HHF2</i> ]                   | Fig. 2                     |
| YAH037<br>(H2A R43A Flo8-HIS3 Fusion)  | Isogenic to YAH034; URA plasmid replaced with p[ <i>CEN LEU2 hta1_R43A-HTB1-HHT2-HHF2</i> ]                   | Fig. 2                     |
| YAH038<br>(H2B R36A Flo8-HIS3 Fusion)  | Isogenic to YAH034; URA plasmid replaced with p[ <i>CEN LEU2 HTA1-htb1_R36A-HHT2-HHF2</i> ]                   | Fig. 2                     |
| YAH039<br>(H2A R78A Flo8-HIS3 Fusion)  | Isogenic to YAH034; URA plasmid replaced with p[ <i>CEN LEU2 hta1_R78A-HTB1-HHT2-HHF2</i> ]                   | Fig. 2                     |
| YAH040<br>(H3 R49A Flo8-HIS3 Fusion)   | Isogenic to YAH034; URA plasmid replaced with p[ <i>CEN LEU2 HTA1-HTB1-hht2_R49A-HHF2</i> ]                   | Fig. 2                     |
| LT019<br>(H3 R49A)                     | Isogenic to WY500; URA replaced with p[ <i>CEN LEU2 HTA1-HTB1-hht2_R49A-HHF2</i> ]                            | Fig. 3,4, S1, S2, S3       |
| LT023<br>(H2A R78A)                    | Isogenic to WY500; URA replaced with p[ <i>CEN LEU2 hta1_R78A-HTB1-HHT2-HHF2</i> ]                            | Fig. 3,4, S1, S2, S3, S4   |
| LT015<br>(H3 R63A)                     | Isogenic to WY500; URA replaced with p[ <i>CEN LEU2 HTA1-HTB1-hht2_R63A-HHF2</i> ]                            | Fig. 4, S1, S2, S3         |
| LT016<br>(H3 R83A)                     | Isogenic to WY500; URA replaced with p[ <i>CEN LEU2 HTA1-HTB1-hht2_R83A-HHF2</i> ]                            | Fig. 4, S1, S2, S3         |
| LT017<br>(H2A R43A)                    | Isogenic to WY500; URA replaced with p[ <i>CEN LEU2 hta1_R43A-HTB1-HHT2-HHF2</i> ]                            | Fig. 4, S1, S2, S3         |
| LT018 (H2B R36A)                       | Isogenic to WY500; URA replaced with p[ <i>CEN LEU2 HTA1-htb1_R36A-HHT2-HHF2</i> ]                            | Fig. 4, S1, S2, S3         |

|                                              |                                                                                                                                                       |            |
|----------------------------------------------|-------------------------------------------------------------------------------------------------------------------------------------------------------|------------|
| WY502 ( <i>set2Δ</i> )                       | Isogenic to WY500 plus <i>set2Δ::KAN</i>                                                                                                              | Fig. S2    |
| RM001.1 ( <i>mag1Δ</i> )                     | Isogenic to WY504 plus <i>mag1Δ::HIS3</i>                                                                                                             | Fig. 4     |
| WY471.1 (WT Gal Shutdown ΔL1)                | Isogenic to WY500; URA plasmid replaced with p[ <i>CEN HIS3 HTA1-pGAL-HTB1-HHT2-HHF2</i> ] p[ <i>CEN LEU2 hta1_Δ39-42-HTB1-HHT2-HHF2</i> ]            | Fig. 5     |
| WY471.3 (WT Gal Shutdown Leu2)               | Isogenic to WY500; URA plasmid replaced with p[ <i>CEN HIS3 HTA1-pGAL-HTB1-HHT2-HHF2</i> ] p[ <i>CEN LEU2</i> ]                                       | Fig. 5     |
| WY471.18 (WT Gal Shutdown H2B R36A)          | Isogenic to WY500; URA plasmid replaced with p[ <i>CEN HIS3 HTA1-pGAL-HTB1-HHT2-HHF2</i> ] p[ <i>CEN LEU2 HTA1-htb1_R36A-HHT2-HHF2</i> ]              | Fig. 5     |
| WY471.23 (WT Gal Shutdown H2A R78A)          | Isogenic to WY500; URA plasmid replaced with p[ <i>CEN HIS3 HTA1-pGAL-HTB1-HHT2-HHF2</i> ] p[ <i>CEN LEU2 hta1_R78A-HTB1-HHT2-HHF2</i> ]              | Fig. 5     |
| WY471.31 (WT Gal Shutdown H2A R78A-H2B R36A) | Isogenic to WY500; URA plasmid replaced with p[ <i>CEN HIS3 HTA1-pGAL-HTB1-HHT2-HHF2</i> ] p[ <i>CEN LEU2 hta1_R78A-htb1_R36A-HHT2-HHF2</i> ]         | Fig. 5     |
| YAH031 (FLAG-tagged WT)                      | Isogenic to WY500; URA plasmid replaced with p[ <i>CEN LEU2 hta1_R78A-HTB1-HHT2-HHF2</i> ] p[ <i>CEN HIS3 HTA1-FLAGtag_htb1-HHT2-HHF2</i> ]           | Fig. 5     |
| YAH011 (WT untagged)                         | Isogenic to WY500; URA plasmid replaced with p[ <i>CEN LEU2 hta1_R78A-HTB1-HHT2-HHF2</i> ] p[ <i>CEN HIS3 hta1_R78A-HTB1-HHT2-HHF2</i> ]              | Fig. 5, S5 |
| YAH012 (FLAG-tagged H2B-H2A R78A)            | Isogenic to WY500; URA plasmid replaced with p[ <i>CEN LEU2 hta1_R78A-HTB1-HHT2-HHF2</i> ] p[ <i>CEN HIS3 hta1_R78A-FLAGtag_htb1-HHT2-HHF2</i> ]      | Fig. 5, S5 |
| YAH013 (FLAG-tagged H2B R36A-H2A R78A)       | Isogenic to WY500; URA plasmid replaced with p[ <i>CEN LEU2 hta1_R78A-HTB1-HHT2-HHF2</i> ] p[ <i>CEN HIS3 hta1_R78A-FLAGtag_htb1_R36A-HHT2-HHF2</i> ] | Fig. 5, S5 |
| YT09 (WT untagged)                           | Isogenic to WY500; URA plasmid replaced with p[ <i>CEN LEU2 HTA1-HTB1-HHT2-HHF2</i> ] p[ <i>CEN URA3 HTA1-HTB1-HHT2-HHF2</i> ]                        | Fig. S6    |
| YT011 (FLAG-tagged H2A R78A H2B R36A)        | Isogenic to WY500; URA plasmid replaced with p[ <i>CEN LEU2 HTA1-htb1_R36A-HHT2-HHF2</i> ] p[ <i>CEN URA3 FLAGtag_hta1_R78A-htb1_R36A-HHT2-HHF2</i> ] | Fig. S6    |
| YT012 (H2A FLAG-tagged WT*)                  | Isogenic to WY500; URA plasmid replaced with p[ <i>CEN LEU2 HTA1-htb1_R36A-HHT2-HHF2</i> ] p[ <i>CEN URA3 FLAGtag_HTA1-HTB1-HHT2-HHF2</i> ]           | Fig. S6    |

\*Strain WY500 is isogenic to JHY205 (AHN *et al.* 2005)
