# Supplementary material
Source: PubMed Central journal article supplement (PMC4512544)
Supplement: 10.1534_115.175885_genetics.115.175885-5.pdf [file 10.1534_115.175885_genetics.115.175885-5.pdf]

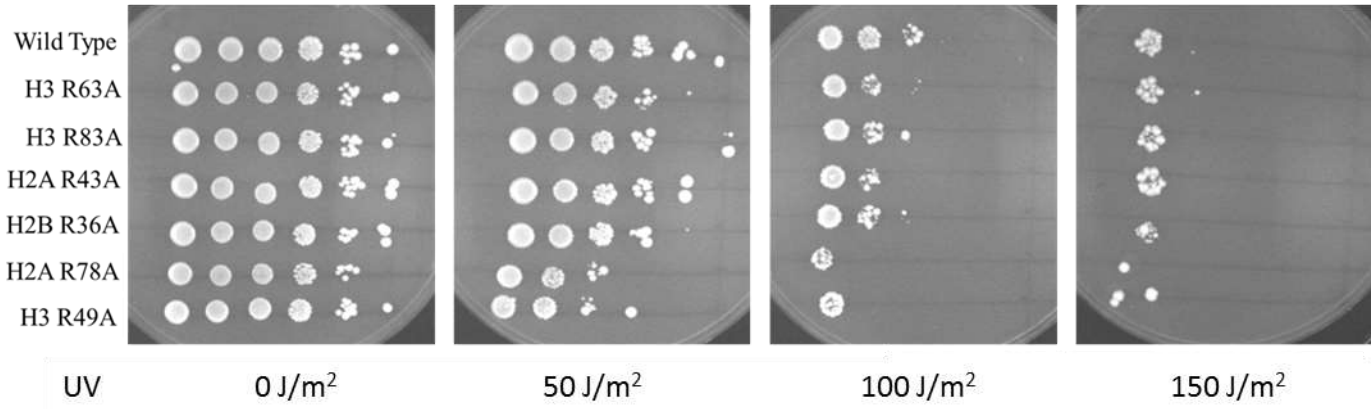

Figure S3. H3 R49A and H2A R78A sprocket arginine mutants are sensitive to UV radiation. Decreasing serial dilutions of mutant yeast cells were spot onto SC plates and exposed to the indicated doses of UV radiation.
