# Supplementary material
Source: PubMed Central journal article supplement (PMC4512544)
Supplement: 10.1534_115.175885_genetics.115.175885-6.pdf [file 10.1534_115.175885_genetics.115.175885-6.pdf]

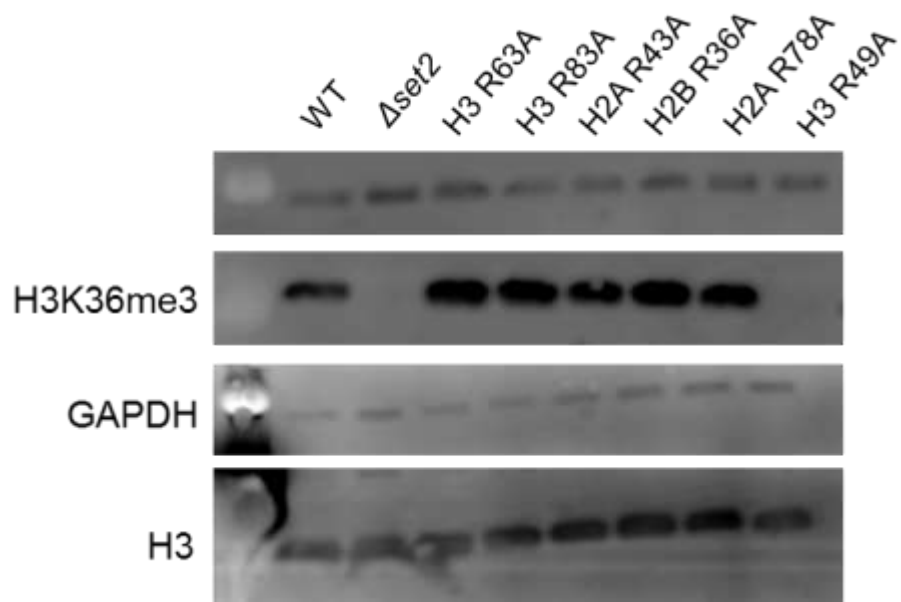

Figure S2. Methylation of H3 K36 in sprocket arginine mutants. Western blots were probed using an antibody specific for H3 K36 trimethylation or for canonical H3. GAPDH is used as a loading control.
