# Supplementary material
Source: PubMed Central journal article supplement (PMC4512544)
Supplement: 10.1534_115.175885_genetics.115.175885-7.pdf [file 10.1534_115.175885_genetics.115.175885-7.pdf]

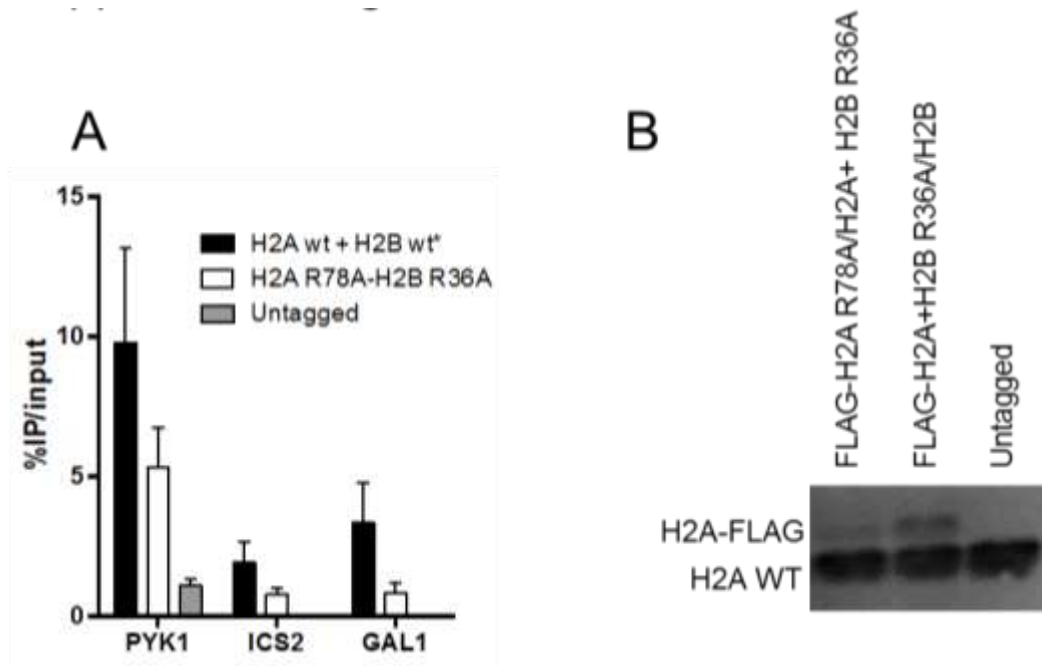

Figure S6. (A) ChIP experiments were conducted as described in Figure 5C, using a FLAG-tagged H2A. Data for the untagged control represents two independent replicates; data for wild type and mutant represents three independent replicates. \*H2B wt was heterozygous for H2A R36 (B) Expression levels of wild type and FLAG-tagged H2A by western blot using an antibody against H2A.
