# Supplementary material
Source: PubMed Central journal article supplement (PMC4512544)
Supplement: 10.1534_115.175885_genetics.115.175885-8.pdf [file 10.1534_115.175885_genetics.115.175885-8.pdf]

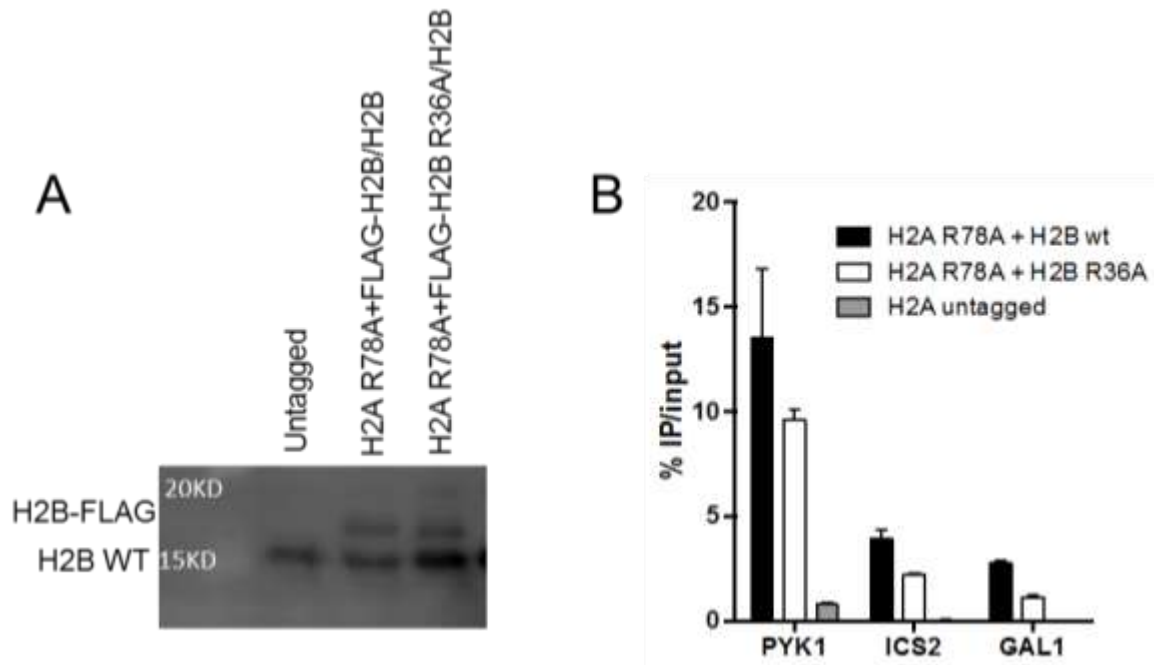

Figure S5. (A) Expression levels of wild type and FLAG-tagged H2B by western blot using an antibody against H2B. Each strain contains an untagged wild type H2B gene as well as the FLAG-tagged H2B. (B) ChIP experiments were conducted as described in Figure 5C.
