# Supplementary material
Source: PubMed Central journal article supplement (PMC4512544)
Supplement: 10.1534_115.175885_genetics.115.175885-9.pdf [file 10.1534_115.175885_genetics.115.175885-9.pdf]

SUPPLEMENTAL MATERIAL

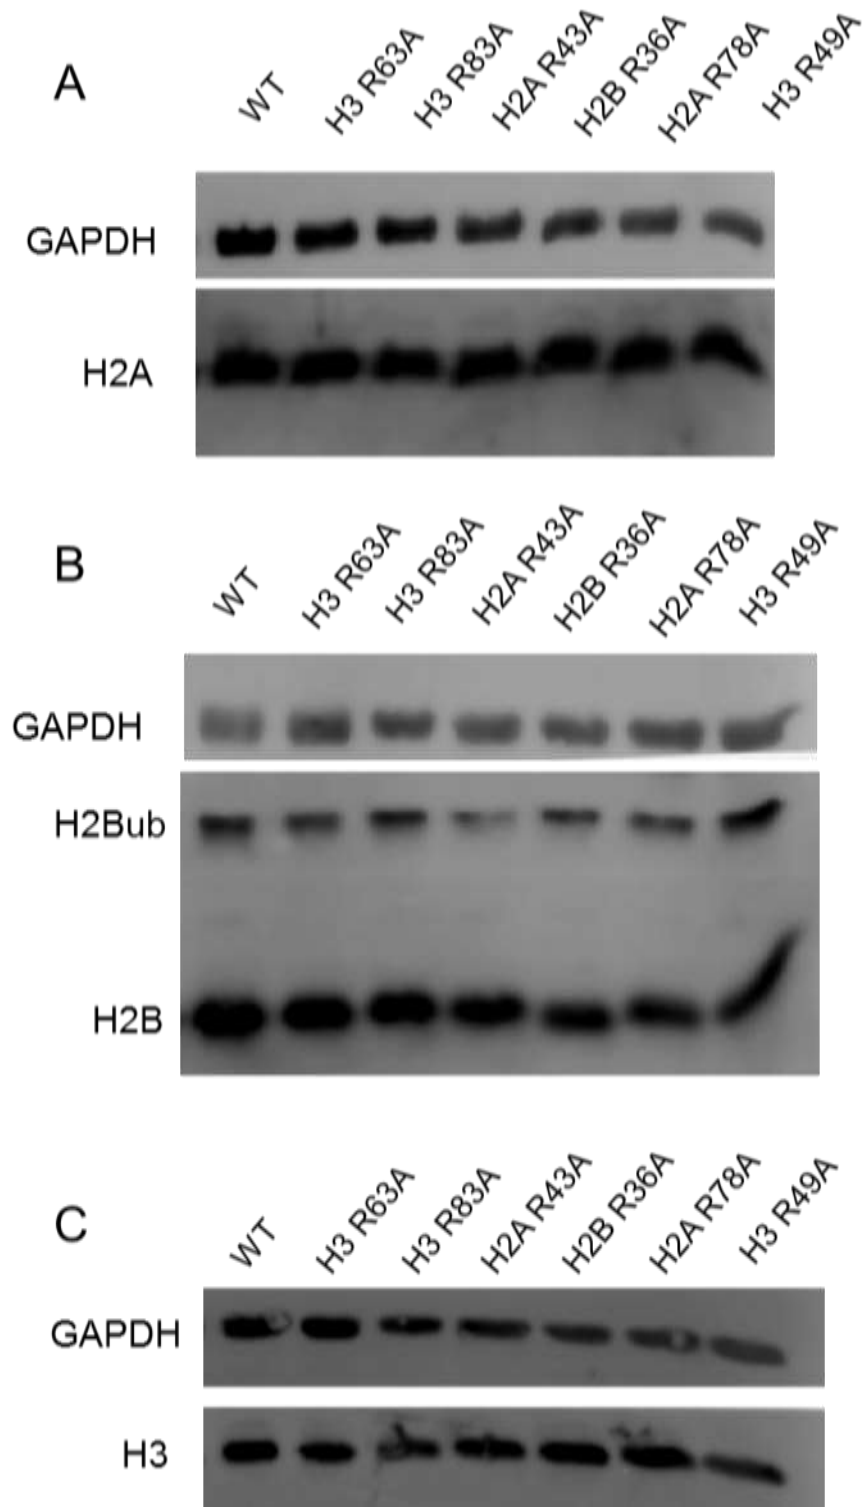

Figure S1. Histone expression levels of viable sprocket arginine mutants. Western blots were probed using antibodies against H2A (A) H2B (B) and H3 (C). GAPDH is used as a loading control.
