# Supplementary material
Source: PubMed Central journal article supplement (PMC4512544)
Supplement: 10.1534_115.175885_genetics.115.175885-10.pdf [file 10.1534_115.175885_genetics.115.175885-10.pdf]

TABLE S2. Plasmids transformed into WY500 for spotting assays

| <b>Plasmid Name</b>         | <b>Genotype</b>                           |
|-----------------------------|-------------------------------------------|
| pJW500* (WT)                | p[CEN LEU2 HTA1-HTB1-HHT2-HHF2]           |
| pLT15 (H3 R63A)             | p[CEN LEU2 HTA1-HTB1-hht2_R63A-HHF2]      |
| pLT16 (H3 R83A)             | p[CEN LEU2 HTA1-HTB1-hht2_R83A-HHF2]      |
| pLT17 (H2A R43A)            | p[CEN LEU2 hta1_R43A-HTB1-HHT2-HHF2]      |
| pLT18 (H2B R36A)            | p[CEN LEU2 HTA1-htb1_R36A-HHT2-HHF2]      |
| pLT23 (H2A R78A)            | p[CEN LEU2 hta1_R78A-HTB1-HHT2-HHF2]      |
| pLT19 (H3 R49A)             | p[CEN LEU2 HTA1-HTB1-hht2_R49A-HHF2]      |
| pLT20 (H3 R63A + H3 R83A)   | p[CEN LEU2 HTA1-HTB1-hht2_R63A_R83A-HHF2] |
| pLT21 (H3 R83 + H2A R43A)   | p[CEN LEU2 hta1_R43A-HTB1-hht2_R83A-HHF2] |
| pLT22 (H2A R43A + H2B R36A) | p[CEN LEU2 hta1_R43A-htb1_R36A-HHT2-HHF2] |
| pLT24 (H2A R78A + H3 R49A)  | p[CEN LEU2 hta1_R78A-HTB1-hht2_R49A-HHF2] |
| pLT31 (H2A R78A + H2B R36A) | p[CEN LEU2 hta1_R78A-htb1_R36A-HHT2-HHF2] |

\*Plasmid pJW500 is identical to pQQ18 (AHN *et al.* 2005)
